# Supplementary material for: A household-based community health worker programme for non-communicable disease, malnutrition, tuberculosis, HIV and maternal health: a stepped-wedge cluster randomised controlled trial in Neno District, Malawi
Source: PubMed Central journal article supplement — BMJ Glob Health. 2021 Sep 15;6(9):e006535. doi: 10.1136/bmjgh-2021-006535 (PMC8444244; doi:10.1136/bmjgh-2021-006535), 2021-09-15
Supplement: bmjgh-2021-006535supp002.pdf [file bmjgh-2021-006535supp002.pdf]

## CHW Accompaniments, Referrals and Home Visits

|                              | CHW Output                                                                                                                                                                           | Accompany | Refer | Documentation<br>R/A: Referral & Accomp Form                                              | Home Visit                                                      |
|------------------------------|--------------------------------------------------------------------------------------------------------------------------------------------------------------------------------------|-----------|-------|-------------------------------------------------------------------------------------------|-----------------------------------------------------------------|
| HIV/STI                      | CHW refer sexually active men and women for testing                                                                                                                                  |           | ✓     | R/A: tick HIV testing or tick Other STI testing                                           |                                                                 |
|                              | CHW accompany dangerous side effects (ARVs)                                                                                                                                          | ✓         |       | R/A Other (name)                                                                          | Monthly                                                         |
|                              | CHW accompany ART patients to routine visits in first year                                                                                                                           | ✓         |       | R/A (Other) and explain reason                                                            | HIV Patient Visit for 1 year, Monthly after 1 year              |
|                              | CHW refer ART clients who miss appointment                                                                                                                                           |           | ✓     | HH Register: TRACE section                                                                | TRACE report cycle                                              |
|                              | CHW refer when PLWHIV are due for viral load check                                                                                                                                   |           | ✓     | HH Register: TRACE section                                                                | When clinic alerts CHW                                          |
|                              | CHW refer mothers and newborns 10 week EID visit for testing and results using TRACE report                                                                                          |           | ✓     | HH Register: TRACE section                                                                | TRACE report cycle                                              |
| TB                           | CHW monitor and refer household members with signs of TB for testing                                                                                                                 |           | ✓     | R/A: Tick Cough (TB)                                                                      | Monthly for new suspected cases                                 |
|                              | CHW refer TB clients who miss appointment                                                                                                                                            |           | ✓     | HH Register: TRACE section                                                                | TRACE report cycle                                              |
|                              | For clients who have submitted sputum, follow up with smear negative clients for danger signs and refer for further examination                                                      |           | ✓     | R/A: tick Other TB sputum follow-up                                                       | TB Patient Visit                                                |
|                              | CHWs refer all family members of new TB clients for screening at the facility and refer all children <5 to the facility for preventive treatment, as notified by HSA/Site supervisor |           | ✓     | R/A: tick Other TB contact tracing                                                        |                                                                 |
|                              | CHW accompany dangerous side effects                                                                                                                                                 | ✓         |       | R/A Other (name)                                                                          |                                                                 |
|                              | CHW accompany TB patients to routine visits                                                                                                                                          | ✓         |       | R/A Other (name)                                                                          |                                                                 |
| Family Planning              | CHW refer WCBA and partners for family planning services                                                                                                                             |           | ✓     | R/A: tick Family planning                                                                 | Monthly for those on short-term methods or without              |
|                              | CHW follow up and refer advise women to seek family planning counselling during their ANC referral and during their 6-week PNC referral                                              |           | ✓     | R/A: tick Family planning                                                                 | Monthly Home Visit (during woman's final pregnancy months), PNC |
| Maternal and Neonatal Health | CHW accompany to first ANC appointment                                                                                                                                               | ✓         |       | HH Register                                                                               | Monthly                                                         |
|                              | CHW refer women to 3 follow-up ANC visits                                                                                                                                            |           | ✓     | HH Register                                                                               |                                                                 |
|                              | CHW accompany danger signs during pregnancy                                                                                                                                          | ✓         |       | HH Register                                                                               |                                                                 |
|                              | CHW accompany/refer pregnant woman and partner to go for delivery/waiting home (Accompaniment depends on whether facility has delivery).                                             | ✓         | ✓     | HH Register                                                                               |                                                                 |
|                              | CHW accompany PNC danger signs for mother and baby                                                                                                                                   | ✓         |       | HH Register                                                                               | PNC + when alerted                                              |
|                              | CHW accompany 1 week PNC                                                                                                                                                             | ✓         |       | HH Register                                                                               | PNC                                                             |
| Child Health                 | CHW refer for 6 week visit                                                                                                                                                           |           | ✓     | HH Register                                                                               | Monthly                                                         |
|                              | CHW refer low MUAC and oedema in <5 year olds                                                                                                                                        |           | ✓     | R/A: tick Malnutrition                                                                    | Monthly                                                         |
|                              | CHW refer signs of wasting and oedema in 0-5 months                                                                                                                                  |           | ✓     | R/A: tick Malnutrition                                                                    | Monthly                                                         |
|                              | CHW refer malnutrition patients with poor appetite or a cough                                                                                                                        |           | ✓     | R/A: tick "Other" note client is enrolled Malnutrition client with cough or poor appetite | At monthly Follow Up                                            |
|                              | CHW refer other households members in patient households who meet malnutrition criteria.                                                                                             |           | ✓     | R/A: tick Malnutrition                                                                    | At monthly Follow Up                                            |
|                              | CHW tracks & refer patients who miss an appointment for CMAM through TRACE                                                                                                           |           | ✓     | HH Register: TRACE section                                                                | TRACE report cycle                                              |
|                              | CHW refer relapse cases who meet malnutrition criteria again                                                                                                                         |           | ✓     | R/A: tick Malnutrition                                                                    | Monthly                                                         |
|                              | CHW refer cough, fever, fast breathing or diarrhea cases in under 5s                                                                                                                 |           | ✓     | R/A: tick "other" and explain reason                                                      | Monthly                                                         |
|                              | CHW refer children for immunization to outreach or health facility                                                                                                                   |           | ✓     | R/A: tick "other" Immunization                                                            | PNC and Monthly (for unimmunized or for 9 month visit)          |
|                              | CHWs refer suspected malaria cases                                                                                                                                                   |           | ✓     | R/A Malaria                                                                               | Monthly                                                         |
| NCDs                         | CHW refer NCD patients to attend routine IC3 visits                                                                                                                                  |           | ✓     | R/A tick Other (Explain reason)                                                           | Monthly                                                         |
|                              | CHW refer NCD clients who miss appointment                                                                                                                                           |           | ✓     | HH Register: TRACE section                                                                | TRACE report cycle                                              |
|                              | CHW accompany Heart Failure cases with danger signs                                                                                                                                  | ✓         |       | R/A tick Other (Explain reason)                                                           | Monthly + when alerted                                          |
|                              | CHW accompany Hypertension and Diabetes cases with danger signs                                                                                                                      | ✓         |       | R/A tick Other (Explain reason)                                                           | Monthly + when alerted                                          |
|                              | CHW identify epileptic cases and refer for treatment                                                                                                                                 |           | ✓     | R/A tick Other (Explain reason)                                                           | Monthly for new suspected cases                                 |
|                              | CHW accompany epileptic danger signs (frequent seizures)                                                                                                                             | ✓         |       | R/A tick Other (Explain reason)                                                           | Monthly + when alerted                                          |
|                              | CHW accompany asthma patients having danger signs                                                                                                                                    | ✓         |       | R/A tick Other (Explain reason)                                                           | Monthly + when alerted                                          |
|                              | CHW accompany mental health patients with psychiatric emergencies                                                                                                                    | ✓         |       | R/A tick Other (Explain reason)                                                           | Monthly + when alerted                                          |
| Other                        | CHW refer other illnesses and accompany emergencies                                                                                                                                  | ✓         | ✓     | R/A: tick Other and explain                                                               | Monthly + when alerted                                          |
