# Supplementary figures and images for: A household-based community health worker programme for non-communicable disease, malnutrition, tuberculosis, HIV and maternal health: a stepped-wedge cluster randomised controlled trial in Neno District, Malawi
Source: PubMed Central journal article supplement — BMJ Glob Health. 2021 Sep 15;6(9):e006535. doi: 10.1136/bmjgh-2021-006535 (PMC8444244; doi:10.1136/bmjgh-2021-006535), 2021-09-15

# Household Model Form Overview

Forms Job Aid

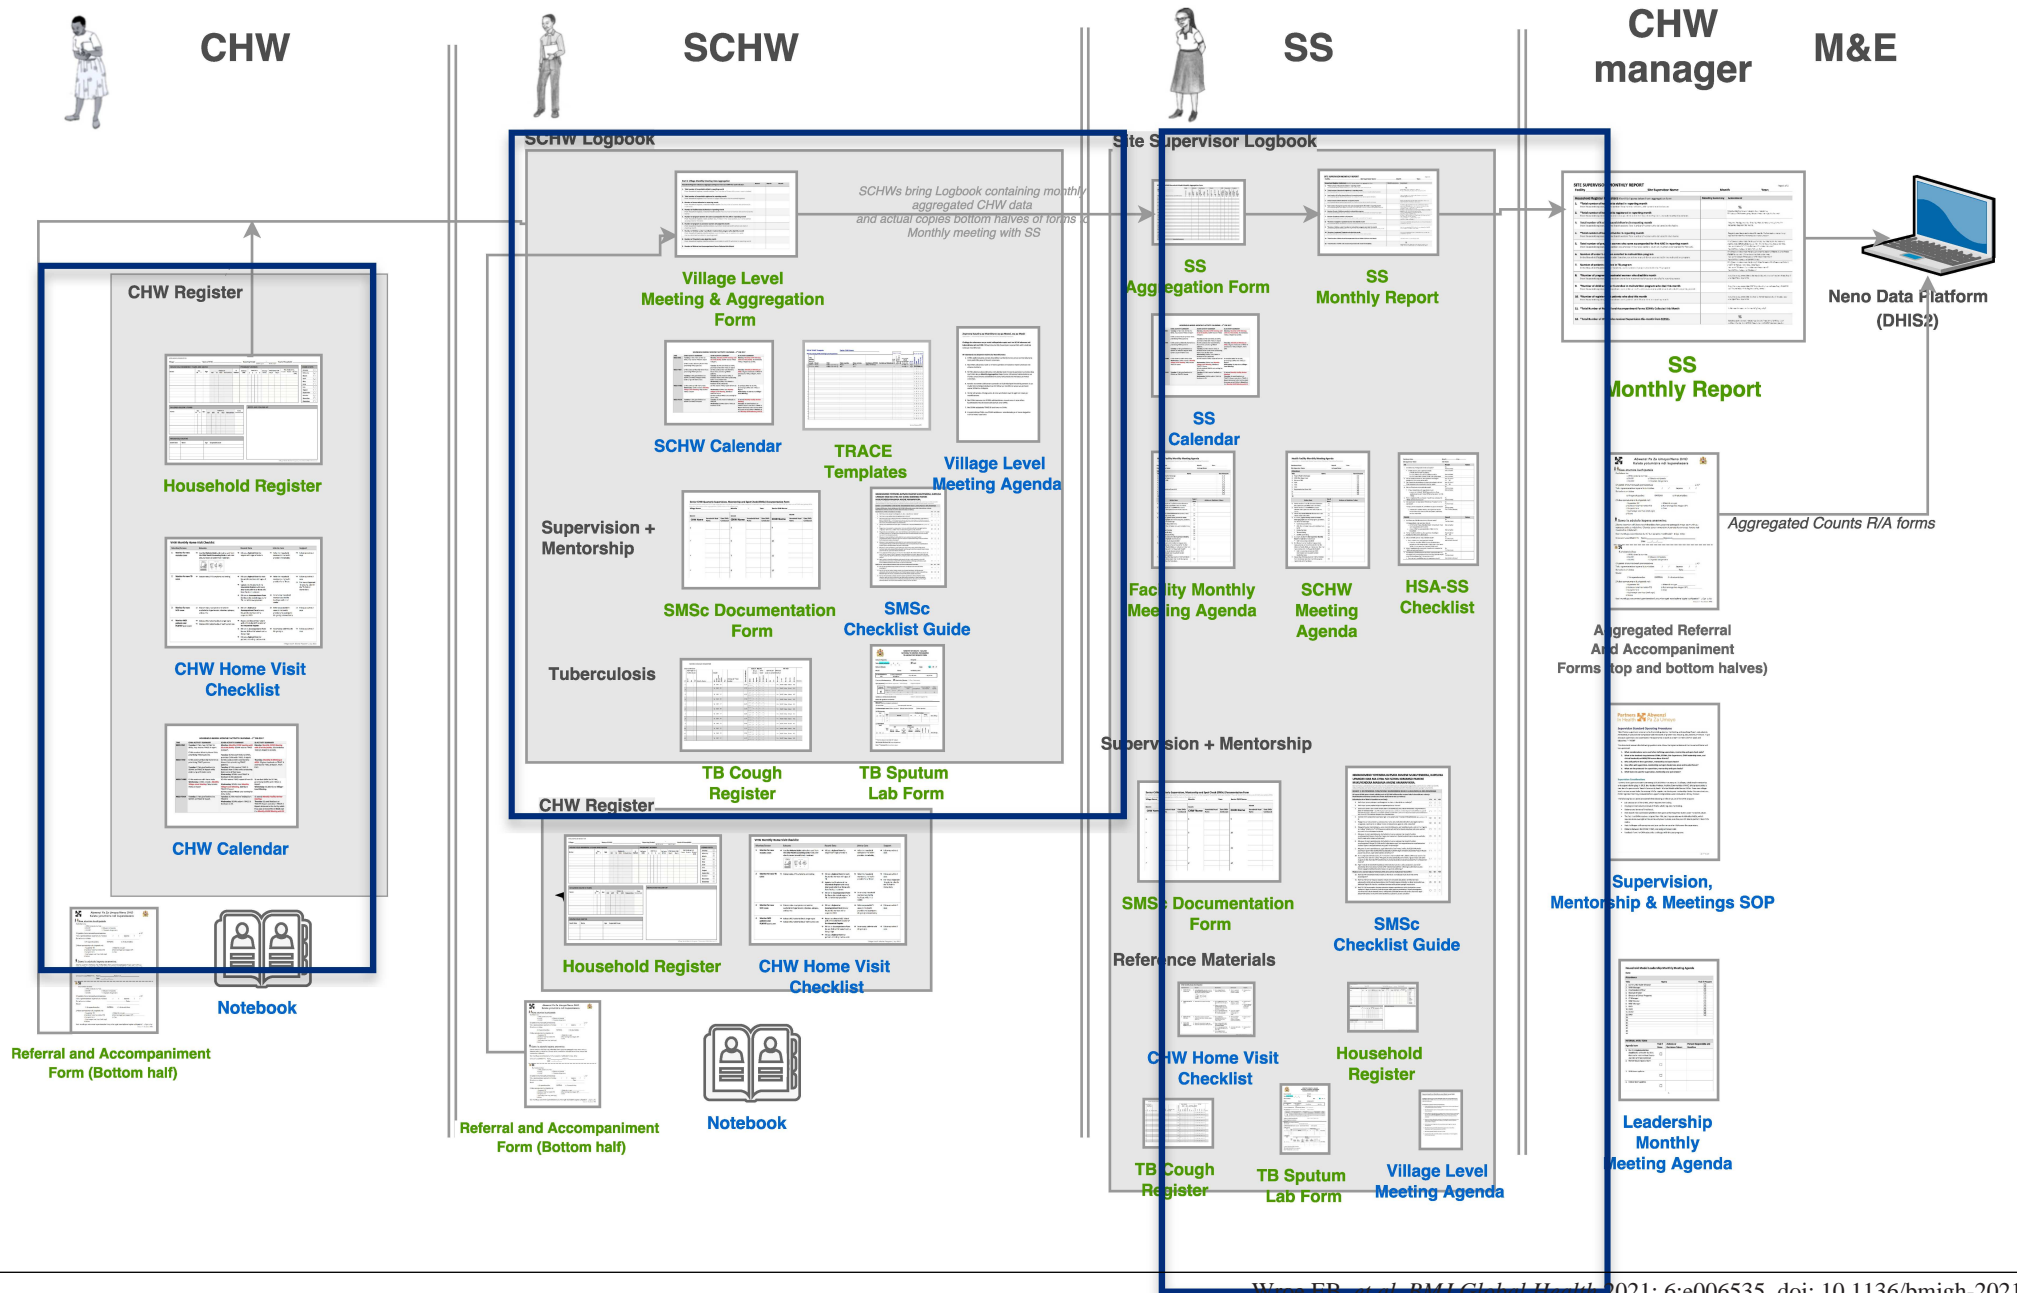

Supplement: bmjgh-2021-006535supp001.pdf [file bmjgh-2021-006535supp001.pdf]
